# Supplementary material for: Systematic Evaluation of Candidate Blood Markers for Detecting Ovarian Cancer
Source: PLoS One. 2008 Jul 9;3(7):e2633. doi: 10.1371/journal.pone.0002633 (PMC2440813; doi:10.1371/journal.pone.0002633)
Supplement: Table S2 — Detailed assay characteristics and conditions for commercial ELISAs. (0.01 MB XLS) [file pone.0002633.s002.xls]

## Sheet: Table2
Table S2. Commercial ELISA Reagents and Conditions
Target Protein	Alias	Assay Source	Cat. No.	Recommended Use(s)	Sensitivity (ng/ml)	Upper Limit of Quantification (ng/ml)	Sample Volume (ul)	Buffer Volume (ul)	Dilution Factor	Sample Preparation	Assay Time	Controls provided?	Substrate	Measure
BMP7		RayBio	ELH-BMP7-001	Supernatants, serum, plasma	0.01	10	100	0	1	"if samples need dilution…"	7hr	N	TMB	450nm
CHI3L1	YKL-40	Quidel	8020	Serum	20	300	20	100	6	20ul samp. + 100ul buff.	5.5hr	Y (high/Low) 1 each	PNPP tablets	405nm
TACSTD1	Ep-CAM	BioVendor	RD194024100R	Supernatants, Serum	1.67 (U/ml)	1000U/ml	50	100	3	50ul + 100ul dilution buffer	4hr	Y (high/Low) 1 each	TMB	450nm
LCN2	MMP-9/NGAL	R&D Systems	DM9L20	Supernatants, Serum	0.002-0.058	20	50	190	4.8	serum 1/20	6.5hr	N	TMB	450nm (corr. 540 or 570)
LCN2	MMP-9/NGAL	Ab Shop	KIT 036	Serum, Plasma, Urine	0.0005-0.004	180	10	4990	500	1/500 in dilution buffer	4hr	N	TMB	450 (corr. 650 or 620)
IGF2		DSL	DSL-10-2600	Serum	2.2	2200	20	1900	96	20ul sample + 950 ul buff.	4.5hr	Y (high/Low) 1 each	TMB	450nm (corr. 600 or 620)
SPP1	Osteopontin	Assay Designs	900-142	Supernatants, plasma-EDTA	0.11	32	100	100	2	N/A	3hr + washes and setup	N	PNPP solution	405nm (corr. 570 or 590)
PRL	Prolactin	DSL	DSL-10-4500	Serum	0.14	180	25	100	5	25ulsample+100ul buff	2h10min +washes and setup	Y (high/Low) 1 each	TMB	450nm (corr. 600 or 620)
MIF		Onco Detectors		Serum	0.1	10	12.5	112.5	10	12.5ul + 112.5ul diluent	51/2 hours + setup	N	TMB	450
MMP7		R&D Systems	DMP700	Supernatants, Serum	0.016	10	50	100	3	1/2 in dilution buffer	4 1/2 hours + setup	N	TMB	450nm (corr. 540 or 570)
IL13RA2		Anogen	EL10039	Supernatants, Serum	10	250	100	0	1	no recommendation	3 1/2 hours + setup	N	TMB	450nm
AMH	MIS	DSL	DSL-10-14400	Serum	0.017	15	20	100	6	20ul sample+100ul buff	3h +washes and setup	Y (high/Low) 1 each	TMB	450nm (corr. 600 or 620)
Note: Y= yes; N= not available; TMB=3,3´,5,5´- tetramethylbenzidine; PNPP = p-NitroPhenyl Phosphate; corr = correction at;
